1  
2  
3  
4  
5  
6  
7  
8  
9  
10  
11  
12  
13

**Evidence for continent-wide convergent evolution and stasis  
throughout 150 years of a biological invasion**

**Authors:** Yihan Wu and Robert I. Colautti\*

**Affiliations:** Department of Biology, Queen’s University, Kingston, Ontario, Canada

\*Correspondence to: [robert.colautti@queensu.ca](mailto:robert.colautti@queensu.ca)

14 **Abstract**

15 The extent to which evolution can rescue a species from extinction, or facilitate range  
16 expansion, depends critically on the rate, duration, and geographical extent of the evolutionary  
17 response to natural selection. While field experiments have demonstrated that adaptive evolution  
18 can occur quickly, our understanding of the duration and geographical extent of contemporary  
19 evolution in natural systems remains limited. This is particularly true for species with large  
20 geographical ranges and for timescales that lie between ‘long-term’ field experiments and the  
21 fossil record. Here, we introduce the Virtual Common Garden (VCG) to estimate genetic  
22 differences among phenotypes observed in natural history collections. Reconstructing 150 years  
23 of evolution in *Lythrum salicaria* (purple loosestrife) as it invaded across North America, we  
24 analyze phenology measurements of 3,429 herbarium records, reconstruct growing conditions  
25 from more than 12 million local temperature records, and validate predictions across three  
26 common gardens spanning 10 degrees of latitude. We find that phenology evolves rapidly and  
27 repeatedly along parallel climatic gradients during the first century of evolution. However, the  
28 rate of microevolution stalls thereafter, recapitulating macroevolutionary stasis observed in the  
29 fossil record. Our study demonstrates why preserved specimens are a critical resource for  
30 understanding limits to evolution in natural. Our results show predictability of evolution  
31 emerging at a continental scale across 15 decades of rapid, adaptive evolution.

32

33 **Significance**

34 Adaptive evolution can help species to persist in new environments. The fossil record  
35 contains many examples of phenotypic stasis punctuated by rapid evolution, with distinct  
36 lineages converging on similar phenotypes over geological timescales. In contrast, the spatio-  
37 temporal dynamics of evolution over ecological timescales are largely unknown. Here, we use a  
38 computational approach to reconstruct 15 decades of evolution in an invasive plant as it spread  
39 across North America. Flowering phenology evolves in parallel throughout the range but stalls  
40 after about a century. This punctuated, convergent evolution recapitulates long-term dynamics in  
41 the fossil record, suggesting constraints on adaptation that are not evident for the first hundred  
42 years.

43

## 44 Introduction

45 Global biodiversity in the Anthropocene is threatened by the jointly homogenizing effects  
46 of population extirpation and biological invasion (Olden *et al.* 2004). These outcomes lie along a  
47 spectrum of population growth trajectories that depend fundamentally on environmental  
48 (mal)adaptation (Colautti *et al.* 2017). Adaptive evolution in novel and changing environments  
49 can rescue populations from extinction (Bell & Gonzalez 2009) and facilitate the spread of  
50 invasive species (Perkins *et al.* 2013). However, genetic constraints limit the evolutionary  
51 response to selection in natural populations such that the balance of adaptation and constraint  
52 within a species partly determine its ecological niche (Blows & Hoffmann 2005). Species  
53 distribution models and management strategies under current and future global change would  
54 therefore benefit from a better understanding of how natural selection and genetic constraints  
55 affect the rate, duration, and geographical extent of adaptive evolution in natural populations.

56 Selection gradients and rates of phenotypic evolution have been studied extensively in  
57 native populations for a variety of taxa (Hendry & Kinnison 1999; Kingsolver *et al.* 2012;  
58 Colautti & Lau 2015; Hendry 2020). In contrast, little is known about selection operating in  
59 natural populations, due to an apparent researcher bias towards studying ‘pristine’ natural  
60 systems (Colautti & Lau 2015). Moreover, the duration and geographical extent of adaptive  
61 evolution are difficult to assess using conventional methods, particularly when one is interested  
62 in variation throughout a species range over decades to centuries timescales. Common garden  
63 studies involving genotypes from contemporary populations can offer insight into evolutionary  
64 changes in response to local environments, but provide only a snapshot of evolutionary change  
65 (Langlet 1971; Savolainen *et al.* 2007; Colautti *et al.* 2009; Hereford 2009; Oduor *et al.* 2016).  
66 ‘Long-term’ ecological studies reveal dynamics that are not evident in short-term experiments,  
67 but are rare due to considerable logistic challenges that also limit the extent of spatial replication  
68 (Knapp *et al.* 2012; Grant & Grant 2014). Therefore, it remains unclear how the rate and  
69 duration of adaptive evolution varies throughout species’ ranges, and whether evolution can be  
70 sustained over the decade to century timescales relevant to managing biodiversity for the 21<sup>st</sup>  
71 century.

72 Invasive species provide opportunities to study evolution in action, but inferences from  
73 contemporary populations are complicated by interactions between demography (i.e. invasion  
74 history) and spatio-temporal variation in natural selection (Colautti & Lau 2015). Clines in  
75 growth and phenology have been identified in many invasive plants, but the rate, duration, and  
76 adaptive significance of cline evolution remains uncertain for most of these species (Colautti *et al.*  
77 *et al.* 2009; Colautti & Lau 2015). For example, a decade of research has shown that flowering time  
78 clines are genetically-based and locally adaptive in invasive populations of *Lythrum salicaria*  
79 (purple loosestrife) from eastern North America (Montague *et al.* 2008; Colautti & Barrett 2013).  
80 Local adaptation in these populations likely evolved as a consequence of both (i) trade-offs  
81 between growth and phenology, and (ii) a latitudinal cline in the strength of directional selection  
82 on flowering time (Colautti & Barrett 2010, 2011, 2013; Colautti *et al.* 2010). However, this  
83 research relies on inferences from contemporary genotypes within a small portion of the North  
84 American distribution. It is therefore uncertain whether parallel clines exist across North  
85 America, and how quickly these adaptive clines evolved during invasion.

86 Generally, adaptive clines could evolve along two distinct trajectories analogous to long-  
87 term evolutionary dynamics observed in the fossil record (Fig. 1). First, a Continuous Evolution  
88 Model (CEM) would predict that the strength and direction of natural selection are relatively  
89 consistent through time as populations evolve toward their locally adaptive fitness optima (Fig.  
90 1a,b). Alternatively, a punctuated equilibrium model (PEM) would predict an early burst of  
91 evolution, followed by a static equilibrium stage with little net directional change (Gould &  
92 Eldredge 1993). This would occur as populations approach their fitness optima and/or lack  
93 sufficient genetic variation to maintain an evolutionary response (Fig. 1c,d). Distinguishing  
94 which models apply to natural populations is important for understanding the rate of  
95 contemporary evolution in response to novel and changing environments. Yet, testing these  
96 alternatives for any study species requires simultaneously reconstructing evolutionary change at  
97 multiple time points and at many locations throughout the range.

98

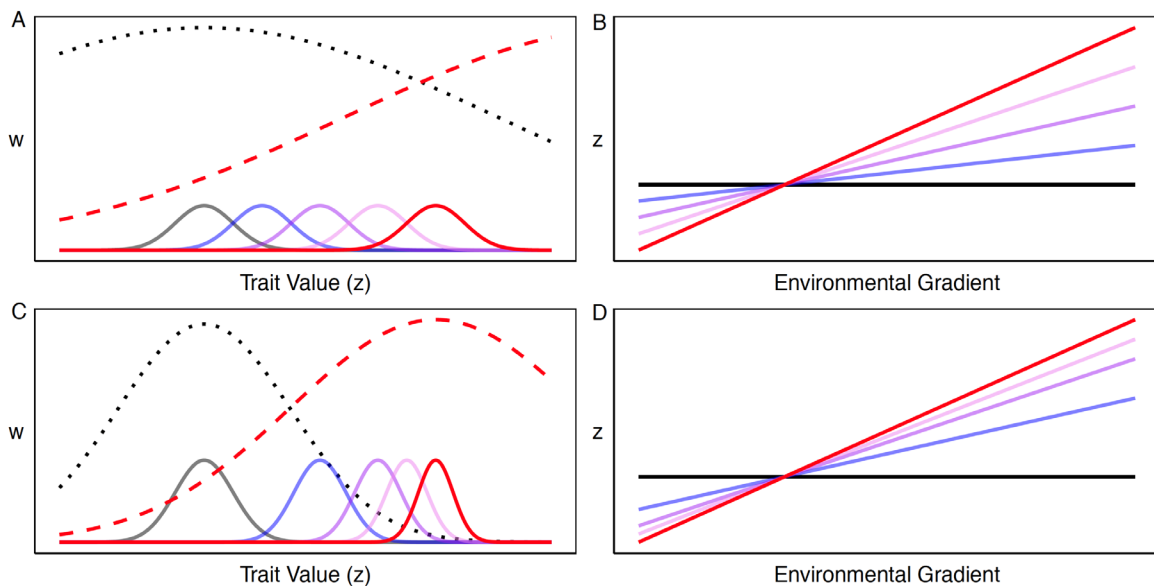

99

100 **Figure 1.** Models of adaptive evolution in a novel environment of a single  
101 population (A & C) and multiple populations along a geographical gradient (B &  
102 D). In the single population model (A & C), ancestral populations (solid grey  
103 curves) are adapted to their ancestral environment (dotted grey curve). After  
104 colonization of a novel environment (or a change in local environment), a trait  
105 under selection evolves over time (blue through red curves) toward a new fitness  
106 optimum (dashed red curve). When adaptive evolution occurs in populations  
107 located along an environmental gradient (B & D), then clines in a trait (z) under  
108 selection increase in magnitude over time. The Continuous Evolution Model  
109 (CEM; A & B) predicts a relatively constant rate of evolution through time. The  
110 Punctuated Evolution Model (PEM; C & D) predicts a deceleration in the rate of  
111 evolution.

112

113 Temporal sampling of genetic changes in natural populations provides some of the  
114 strongest evidence for adaptive evolution in nature (Franks *et al.* 2007; Grant & Grant 2014), but  
115 these experiments are difficult to replicate over large spatial and temporal scales (Etterson *et al.*  
116 2016; Franks *et al.* 2017; Weider *et al.* 2018). In contrast, millions of preserved specimens  
117 maintained in global natural history collections provide a detailed record of phenotypic change  
118 over decades to centuries past, holding potential for reconstructing evolutionary trajectories  
119 (Willis *et al.* 2017; Lang *et al.* 2019). However, evolutionary shifts in phenotypic traits observed  
120 under natural field conditions are difficult to distinguish from developmental plasticity  
121 associated with different environments (Merilä & Hendry 2014). Thus, it would be valuable to  
122 incorporate data from controlled experiments to empirically model the effects of development  
123 environment and genetic differentiation on phenotypes observed in the field. Such a model could  
124 enable tests of adaptive evolution and genetic constraint across broad temporal and spatial scales.

125 Here, we introduce the virtual common garden (VCG) as a novel computational  
126 approach, parameterized by field experiments, to model phenotypic plasticity and genetic  
127 differentiation in phenotypic data from historical archives. As such, the VCG can be thought of  
128 as a new form of observational experiment for eco-evolutionary inference. We use this approach  
129 to reconstruct 150 years of phenotypic evolution in the wetland perennial *Lythrum salicaria*  
130 (purple loosestrife) as it spread across North America. Our specific goals are: (i) to parameterize  
131 and then validate the VCG as a method to distinguish genetic variation from developmental  
132 plasticity in *L. salicaria*; (ii) to test for convergent evolution in the form of parallel phenology  
133 clines replicated across North America; (iii) to measure changes in the rate of cline evolution  
134 through time in order to test the CEM and PEM models shown in Figure 1.

135

## 136 **Methods**

### 137 *Phenology of herbarium specimens*

138 Between August 2016 and December 2017, we analyzed 3,429 digitized herbarium  
139 specimens obtained from five sources: (i) the Global Biodiversity Information Facility (GBIF,  
140 <http://www.gbif.org/>), (ii) the Regional Networks of North America Herbaria accessed through  
141 the Arizona-Mexico Chapter (<http://swbiodiversity.org>), (iii) the New York Botanical Garden  
142 (NYBG, <http://www.nybg.org/>), and (iv) the Database of Vascular Plants of Canada (VASCAN)  
143 (20)(Desmet & Brouillet 2013) and v) correspondence with 19 university herbaria to obtain more  
144 images (see acknowledgements in main text). We included only specimens with both a full  
145 collection date (year, month, day) and location information that could be georeferenced (see  
146 Supplementary Methods).

147 Inflorescence development in *L. salicaria* occurs acropetally from the base of the stem to  
148 the tip of the apical meristem, resulting in three distinct regions of the inflorescence: fruits  
149 (basal), flowers, and buds (distal). To capture variation in floral phenology, we measured the  
150 length of each segment on each specimen using the segmented tool in ImageJ (Schneider *et al.*

151 2012). We did this for the primary meristem, unless it was clearly damaged in which case the  
152 longest inflorescence was measured. Unpollinated flowers in *L. salicaria* senesce and fall off of  
153 the stem but leave a distinctive scar; these were included as fruits as they represent a post-  
154 flowering phenology. Using these measurements, we calculated a scale-free phenological index  
155 ( $\varphi$ ) for each herbarium specimen  $i$ :

$$156 \quad \varphi_i = \frac{0 * buds_i + 0.5 * fruits + 1 * fruits_i}{total_i}$$

157 Values of  $\varphi$  range from 0 (early) to 1 (late) as a measure of phenological stage at the time  
158 of collection. Thus, on any given collection date, specimens with a phenology index closer to 0  
159 represent phenotypes early in their phenology whereas those with an index closer to 1 represent  
160 phenotypes sampled later in phenological development.

161 Herbarium specimens are not often random samples of natural populations. Instead,  
162 sampling locations are chosen deliberately or opportunistically, introducing potential sampling  
163 biases. For example, first flowering dates observed in herbarium specimens collected from New  
164 England (USA) were biased toward a delay of ~3d relative to field observations; however dates  
165 were highly correlated with field observations despite this bias (Davis *et al.* 2015). Spatial and  
166 temporal clustering of samples is also likely when multiple specimens are often collected in  
167 sampling excursions conducted by a single individual or group. We therefore developed an  
168 analysis that would be robust to phenological stage, sampling date, absolute flowering date, and  
169 spatial clustering, as described below.

170

### 171 ***Season Length and Growth Conditions***

172 Season length ( $SL$ ) is a key predictor of genetic differentiation for flowering phenology in  
173 *L. salicaria*, whereas growing-degree days at the time of collection ( $GDD_C$ ) determines the rate  
174 of growth and development and thus plasticity in phenology (Shamsi & Whitehead 1974; Chun  
175 2011; Lindgren & Walker 2012; Colautti & Barrett 2013). Both  $SL$  and  $GDD_C$  were interpolated  
176 from computation of daily weather data available from the Global Historical Climatology  
177 Network-Daily database (Menne *et al.* 2012). The algorithms and code for the computational  
178 interpolation are available on the Dryad Database (DOI: [Reviewer Note: zip files for Dryad are](#)  
179 [uploaded with manuscript and also available in public Repo on GitHub](#)  
180 <https://github.com/ColauttiLab/WuColauttiHerbarium>). Briefly, we collected temperature data  
181 for each herbarium specimen from up to 20 of the closest weather stations located within 0.5°  
182 latitude and longitude (Fig. 2). For each weather station, we identified the first interval of at least  
183 10 consecutive days above a threshold growing temperature (8° C) from Jan 1 in the year of  
184 collection. The first day of this interval was set as the start of the growing season, and the end of  
185 the growing season was determined as the first day thereafter in which the temperature fell below  
186 8° C. Temperature accumulation above 8° C is a key factor affecting growth and development of  
187 *L. salicaria*, and commonly used in growth models for the species (Shamsi & Whitehead 1974;  
188 Montague *et al.* 2008; Ferrarese *et al.* 2009; Lindgren & Walker 2012). A length of 10 days at  
189 the start of the season was chosen to avoid shorter intervals of abnormally warm winter or spring

190 temperatures where growth would be unlikely. We then used the season start date to calculate the  
191 cumulative growing degree days until the day of collection ( $GDD_C$ ). In summary,  $GDD_C$   
192 characterizes the local growing environment in order to correct for variation in growing  
193 conditions and sampling date, whereas variation in season length ( $SL$ ) is predicted to drive  
194 differentiation via local adaptation to climate.

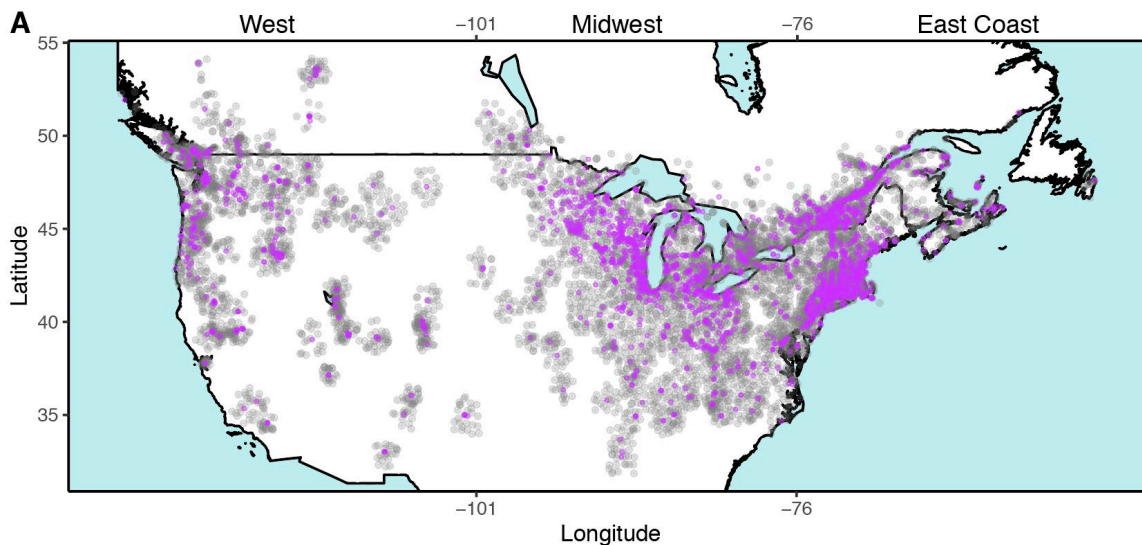

195

196 **Figure 2.** Map of the United States and Canada showing locations of 3,429 *Lythrum*  
197 *salicaria* specimens (purple dots) collected between 1866 and 2016, and locations of  
198 6,303 weather stations (light grey dots) used to interpolate local climate data.  
199 Specimens are classified into three geographical regions with different invasion  
200 histories: West (< -101° longitude), Midwest (-76° to -101°), and East Coast (> -76°  
201 longitude).

202

### 203 *Virtual Common Garden (VCG)*

204 Field surveys and common garden experiments with *L. salicaria* have demonstrated both  
205 plastic and genetic variation for flowering phenology – warmer temperatures accelerate  
206 phenological development, whereas natural selection has caused the evolution of earlier  
207 flowering in short growing seasons (Shamsi & Whitehead 1974; Colautti & Barrett 2013). By  
208 comparison, population-by-environment interactions are relatively weak, even across field sites  
209 spanning a latitudinal gradient of 1,000 km (Colautti & Barrett 2013). Leveraging these  
210 observations, the VCG uses temperature accumulation data to model phenology as the additive  
211 effects of genotype and plasticity. Since we cannot retroactively grow herbarium specimens in a  
212 common garden, we instead correct the observed phenological stage of each specimen ( $\varphi_i$ ) for  
213 variation in the local growing environment ( $E_i$ ) to estimate a relative measure of phenological  
214 development time due to genetic factors ( $\psi_i$ ):

215

$$\psi_i = E_i - \varphi_i$$

216 As described later,  $E_i$  is estimated from a nonlinear least-squares model of phenology as a  
217 logistic function of  $GDD_C$ . The equation for phenological development time ( $\psi$ ) is therefore the  
218 residual phenological stage after accounting for  $GDD_C$ , multiplied by negative one. We use the  
219 negative multiple so that values for phenology in herbarium specimens lay in the same direction  
220 of more common phenological measurements (e.g. days to first flower, time to maturity).

221 In summary, we use two indices to describe the phenology of each herbarium specimen:  
222 The phenological stage ( $\varphi$ ) is calculated directly from inflorescence measurements. The  
223 phenological development time ( $\psi$ ) is an estimate of relative phenology after controlling for  
224 local growing environment. Phenological stage ( $\varphi$ ) ranges from 0 (early stage) to 1 (late stage)  
225 and is determined by genetic factors, local growing conditions, and collection date. In contrast,  
226 the phenological development time ( $\psi$ ) ranges from -1 (fast phenology) to 1 (slow phenology)  
227 and predicts genetic effects on phenology. As such,  $\psi$  is a standardized phenology metric that  
228 predicts which phenotypes would be observed when grown under similar rearing conditions – a  
229 virtual common garden.

230

### 231 ***VCG validation***

232 To validate the VGC, we compare the predicted phenological development time ( $\psi_i$ )  
233 inferred from herbarium specimens with observed flowering time clines reported in three  
234 separate common garden field experiments. These experiments are part of a previously published  
235 reciprocal transplant study involving six populations sampled along a gradient of 10° latitude in  
236 eastern North America and grown at three sites: Timmins, Ontario (TIM), the Koffler Scientific  
237 Reserve (KSR) near Newmarket, Ontario, Canada, and the Blandy Experimental Farm (BEF)  
238 near Boyce, Virginia (Colautti & Barrett 2013).

239 To facilitate comparison of virtual and real common garden metrics, we standardized  
240 population means within each dataset to z-scores (Mean = 0, SD = 1) and included only  
241 herbarium specimens collected after 1960 from the same geographic range in northeastern North  
242 America. This date was chosen to maximize sample size while reducing the influence of early  
243 collections that could have occurred long before populations became locally adapted. However,  
244 we also examined temporal changes in phenology, as described in the next section.

245 Herbarium specimens were binned into geographic populations at intervals of 1° latitude  
246 for comparison with geographic populations sampled in the reciprocal transplant experiment. We  
247 used four separate bootstrap models, (1000 iterations each, with replacement) to estimate  
248 latitudinal clines and 95% confidence intervals for each of the four ‘gardens’ (i.e. VCG, TIM,  
249 KSR, BEF). In each iteration, we calculated the correlation between the population mean z-score  
250 and latitude, resampling either the phenological index ( $\psi$ ) of herbarium specimens ( $N = 449$ )  
251 binned into nine geographic ‘populations’ (VCG) or average flowering times of seed families  
252 sampled from six populations ( $N = 82$ ).

253



## 254 *Population Age and Cline Evolution*

255 After validating the VCG analysis for eastern North America, we tested for parallel  
256 latitudinal clines predicted by a selection-constraint model of local adaptation to season length  
257 (Colautti *et al.* 2010; Colautti & Barrett 2011, 2013). This model predicts an evolutionary shift  
258 from slow to fast phenology under shorter season lengths. We also tested the CEM and GEM  
259 predictions (Fig. 1) by looking at temporal changes in the rate of cline evolution. In addition to  
260 examining clines in season length in a combined statistical model, we separately analyzed three  
261 regions with different invasion times that are also separated by natural gaps in the distribution  
262 (Fig. 2): East Coast (< 76 °W), Midwest (76 °W-101 °W), and West Coast (> 101 °W).

263 To examine changes in the rate of evolution over time, we first had to estimate population  
264 age, which we did using Kriging interpolation in R (Gräler *et al.* 2016). In addition to collection  
265 dates of available herbarium records, we also included dates of other field observations available  
266 from the Global Biodiversity Information Facility (GBIF), Biodiversity Information Serving Our  
267 Nation (BISON), and Vascular Plants of Canada (VASCAN) (Desmet & Brouillet 2013;  
268 GBIF.org 2017; US Geological Survey 2019). Data were pooled into grid units of one degree  
269 latitude and longitude, and within each grid unit, the year of the earliest observation was used to  
270 estimate the date of colonization. Our estimate of population age for each specimen was  
271 calculated by subtracting the collection year of each specimen from the locally interpolated (i.e.  
272 Kriged) year of invasion.

273

## 274 *Statistical Test of Phenology Evolution*

275 We modeled phenological development using a nonlinear least squares (NLS) regression  
276 equation based on the Universal Gompertz curve (Tjørve & Tjørve 2017), which is a sigmoidal  
277 curve of the form:

$$278 \quad \varphi = \beta_a e^{-eF}$$

279 where  $\beta_a$  is an estimate of the y-intercept and  $F$  is a statistical model that differs for each of three  
280 analyses, as outlined below.

281 To calculate the standardized phenology development time of each specimen ( $\psi_i$ ), we  
282 modeled the phenological index ( $\varphi$ ) as a function of growing environment ( $GDD_C$ ):

$$283 \quad F = \beta_b GDD_C$$

284 Predictions from this model are the environmental effects on phenology ( $E_i$ ) in the VCG analysis  
285 described earlier.

286 To test for evidence of evolution, we simultaneously estimated the relative effects of growing  
287 environment ( $GDD_C$ ), season length ( $SL$ ) and population age ( $Age$ ). We also examined how the  
288 effects of  $GDD_C$  and  $SL$  change with population age:

$$289 \quad F = (\beta_b + \beta_c Age + \beta_d SL + \beta_e Age \cdot SL) GDD_C$$

290 We refer to  $\beta_b$  as the temperature accumulation coefficient,  $\beta_c$  as the population age  
291 coefficient and  $\beta_d$  as the season length coefficient. The coefficient  $\beta_e$  estimates the interactive  
292 effect of age-by-season length on phenological development. To avoid problems with spatial  
293 heterogeneity in the collections (e.g. geographical sampling bias), we fit and tested the model  
294 with 1000 bootstrap datasets created by randomly sampling a single specimen within each cell of  
295 a  $0.1^\circ$  latitude by  $0.1^\circ$  longitude grid.

296 In addition to a single model testing evolution on the full set of herbarium specimens, we  
297 also performed individual models for specimens binned into six age classes based on our Kriging  
298 model: < 30 years, 31-60, 61-90, 91-120, 121-150, and > 151. We used a similar bootstrap model  
299 as described above to account for spatial heterogeneity. Without population age as a predictor,  
300 the equation for each bin simplifies to:

301 
$$F = (\beta_b + \beta_d \cdot SL) \cdot GDD_c$$

302 To visualize how model coefficients changed over time, we fit linear and quadratic  
303 models to the bootstrapped estimates of  $\beta_b$  and  $\beta_d$ , using the age of each time bin as the  
304 predictor variable, and each model coefficient as the response variable.

## 305 **Results**

### 306 *Herbarium Specimens*

307 Our spatially-weighted interpolation of Growing Degree Days ( $GDD_c$ ) and Season  
308 Length ( $SL$ ) for each of the 3,429 digitized herbarium specimens was based on >12 million  
309 temperature records, used to reconstruct 62,208 annual temperature accumulation curves from  
310 6,303 weather stations (Fig. 2).

311 A final set of measurements from all digitized herbarium specimens (Fig. 2) that met  
312 inclusion criteria are available online in the Dryad Database (DOI: [Reviewer Note: zip files for  
313 Dryad are uploaded with manuscript and also available in public Repo on GitHub  
314 <https://github.com/ColauttiLab/WuColauttiHerbarium>](#)) with images available from sources cited  
315 therein. The earliest specimen was collected on July 29th, 1866 near Boston, Massachusetts, with  
316 the number of samples increasing thereafter to a peak in the 1970s and declining in recent  
317 decades (Fig. S2). The most recent specimen was collected on August 31, 2016 from Lake  
318 Lowell in Idaho. Specimens cover a large part of North America spanning from Atlantic to  
319 Pacific coasts, and almost 20 degrees of latitude, from as far south as Carthage, Mississippi,  
320 USA ( $32.74^\circ\text{N}$ ) to Prince George in BC, Canada in the north ( $54^\circ\text{N}$ ). Most specimens were  
321 collected in the East Coast and Midwest regions (Fig. 2), each with over 1,000 specimens, while  
322 the West region contains approximately 400 specimens (Table S1). The most densely sampled  
323 regions are the Great Lakes region (particularly in Illinois and Wisconsin), along the  
324 St. Lawrence River, and along the northeastern coastal region of North America (Fig. 2).

325 The average Julian day of collection was 217 d ( $sd = 25.18$ ), or August 5 in a non-leap  
326 year, and ranged from 121 d (May 1, 1938) to 365 d (December 31, 1906). This represents a  
327 broad range of days measured from the start of the growing season at each location, with a mean  
328 of 98 d (min = 8, max 263) (Fig. S4). Growing season length ( $SL$ ) estimated from weather

329 stations varied across regions, with the average growing season longer in the West Coast region  
330 and decreasing eastward; SL was also strongly correlated to latitude ( $r = -0.6$ ). Specimens  
331 represented a broad range of phenological stage from a few buds to fully mature fruits. There  
332 was no clear bias with respect to phenology sampling, as all but the earliest phenologies were  
333 evenly distributed (Fig. S3). Nor did we find strong clustering of phenologies with respect to  
334 geography, even though some structure is expected due to the aforementioned relationship  
335 between season length and latitude (Fig. S5).

336

### 337 ***VCG Validation***

338 To validate the VCG we compared (i) latitudinal clines in development time ( $\psi$ ) of  
339 herbarium specimens with (ii) days to first flower in three real-world common garden  
340 experiments in eastern North America (data from (Colautti & Barrett 2013)), each standardized  
341 to a mean of zero and unit variance. This comparison involves heterogenous phenology  
342 measurements (i.e.  $\psi$  and days to first flower) and growing conditions (i.e. a virtual common  
343 garden and three garden sites spanning  $10^\circ$  of latitude), yet the estimated latitudinal clines were  
344 remarkably consistent (Fig. 3). The correlation coefficient observed in the VCG ( $r = -0.70$ ,  
345 bootstrapped 95% CI: -0.17 to -0.92) was not significantly different from those measured in real-  
346 world field transplant sites at northern ( $r = -0.84$ , CI: -0.70 to -0.95), mid-latitude ( $r = -0.77$ , CI:  
347 -0.60 to -0.90) and southern gardens ( $r = -0.87$ , CI: -0.75 to -0.95).

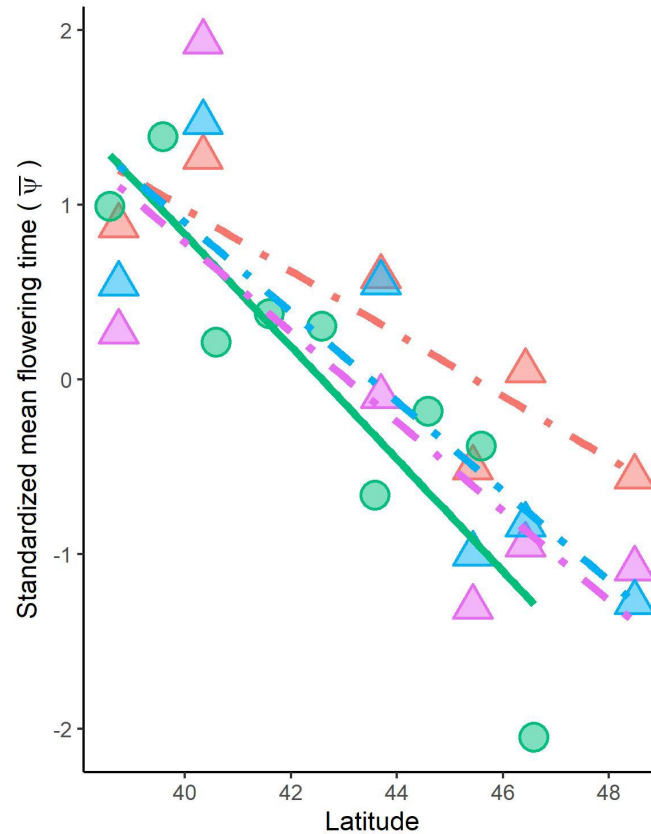

348

349

350

351

352

353

354

355

356

357

358

### *Cline evolution*

359

360

361

362

363

364

365

366

Clines in phenology with growing season were observed in all three geographic regions for specimens collected after 1980, and generally weakened back through time (Fig. 4, Table S3). We used the NLS model as a formal statistical test of evolutionary changes using dates of establishment estimated from Kriging (Fig. S1). The NLS model relates the observed phenological stage ( $\phi$ ) of a specimen to the accumulated temperature it experienced up to the day of collection and the total season length in which it evolved (Fig. 5a, Table S4). The estimated model coefficients for linear (CEM) and quadratic (PEM) models are reported in Table S5 for the effect of temperature accumulation on phenology ( $\beta_b$ ), and Table S6 shows the coefficients

367 for the effect of season length on phenology ( $\beta_d$ ). The quadratic terms were significant for both  
368  $\beta_b$  (Likelihood Ratio Test:  $\chi^2 = 5448$ ,  $p < 0.001$ ) and  $\beta_d$  ( $\chi^2 = 3045$ ,  $p < 0.001$ ) based on  
369 likelihood Ratio, tests with a ~15% increase in  $R^2$  values ( $\beta_b$ : 0.763 to 0.876;  $\beta_d$ : 0.713 to  
370 0.810). This is shown in Figure 5 wherein the coefficients for  $\beta_b$  (Fig. 5b) and  $\beta_d$  (Fig. 5c)  
371 stabilize around 100 years post-establishment.

372

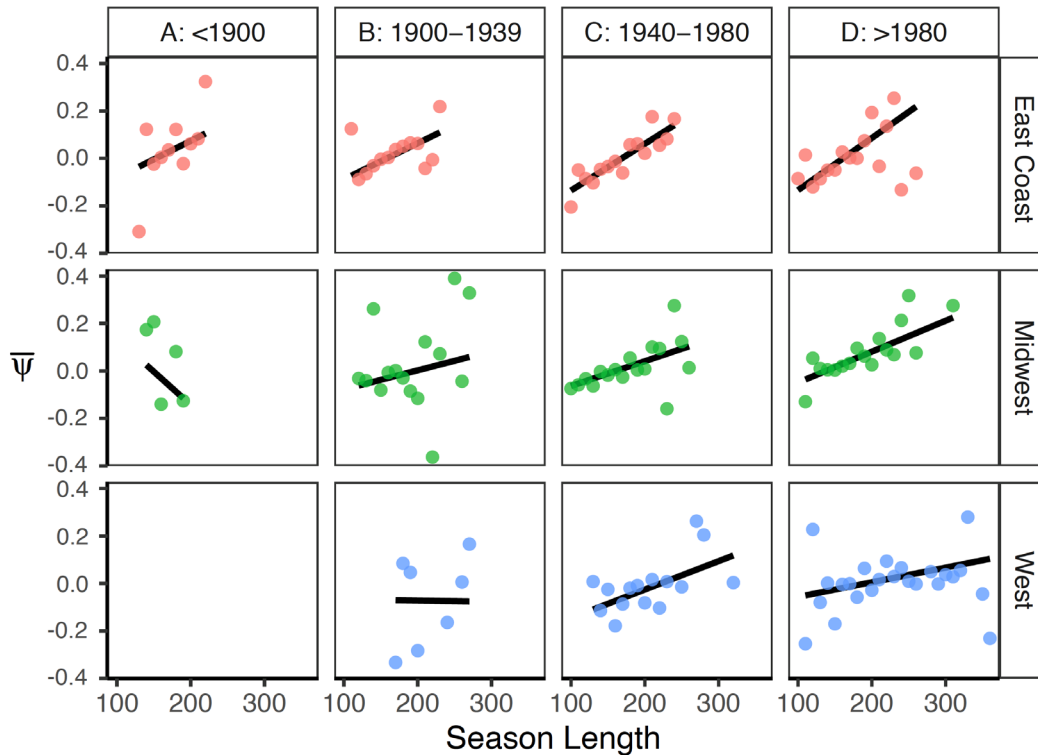

373

374 **Figure 4.** Spatial (rows) and temporal variation (columns) in phenological clines of  
375 *Lythrum salicaria* as it spread across North America. Clines in the East Coast (red  
376 dots, top row), Midwest (green dots, middle row), and West regions (blue dots,  
377 bottom row) are divided by time of collection, binned into four eras (columns). Each  
378 bivariate plot shows the relationship between the mean phenological development  
379 time of herbarium specimens ( $\bar{\psi}$ ) and the mean estimated season length, averaged  
380 across specimens binned every ten days of season length.

381

382

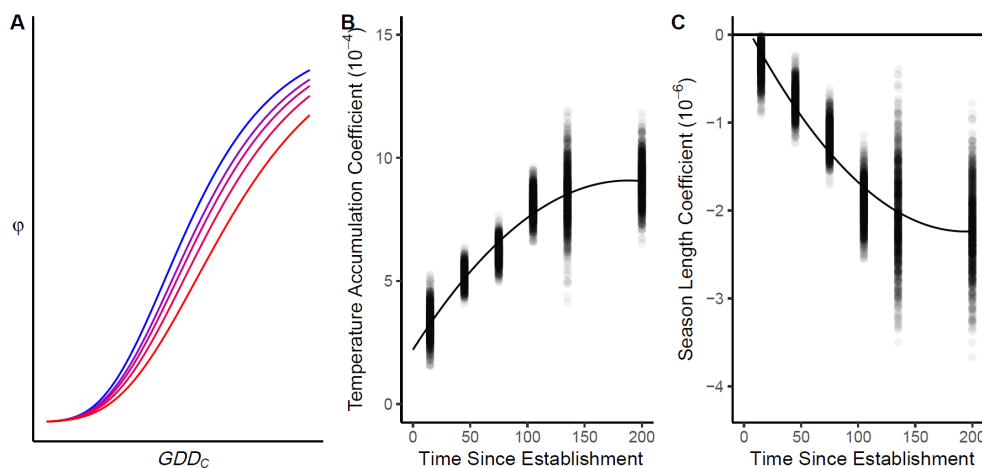

383

384 **Figure 5.** A nonlinear least-squares (NLS) model testing temporal changes in  
385 phenology clines. (A) A model of observed phenological stage ( $\phi$ ) as a function of  
386 local growing conditions (growing-degree days at the time of collection;  $GDD_C$ ) for  
387 five different season lengths ( $SL$ ) parameters ranging from short/northern (blue) to  
388 long/southern (red). (B) Bootstrap estimates of  $\beta_b$ , the model coefficient for  $GDD_C$ .  
389 (C) Bootstrap estimates of  $\beta_a$ , the model coefficient for season length ( $SL$ ).  
390 Bootstrap estimates include 1,000 spatially explicit resampling iterations (with  
391 replacement) with specimens binned into one of six classes of population age (i.e.  
392 time since establishment).

393

## 394 Discussion

395 Geographical clines in morphological, physiological and life-history traits are common to  
396 many taxa, but the timescale and geographical extent of cline evolution has been difficult to  
397 assess. In this study, we introduced the Virtual Common Garden (VCG) analysis as a  
398 computational approach to test evolutionary hypotheses using natural history collections by  
399 accounting for variation in local growing environments. Below, we explore the relevance of our  
400 findings to evolution in novel environments and the spread of invasive species.

401 Feedbacks between colonization and trait evolution can facilitate rapid range expansion  
402 (Perkins *et al.* 2013; Williams *et al.* 2016; Szűcs *et al.* 2017), but clines per se are not evidence  
403 for adaptive evolution because non-adaptive and maladaptive clines can evolve through repeated  
404 founder events during spread (Peischl *et al.* 2013; Colautti & Lau 2015). A reciprocal transplant  
405 experiment involving *L. salicaria* demonstrated that flowering time clines are adaptive in part of  
406 eastern North America (Colautti & Barrett 2013), but it has been less clear whether natural  
407 selection is a generally a causal agent of cline formation or merely works in a supporting role to

408 maintain clines that evolved through stochastic processes. Molecular genetic markers can help to  
409 distinguish adaptive evolution from non-adaptive, demographic effects. However, this approach  
410 has limitations for quantitative traits like phenology, for organisms like *L. salicaria* that lack an  
411 annotated genome, and for populations with complex demographic histories like invasive species  
412 (Lohmueller 2014; Colautti & Lau 2015; Novembre & Barton 2018). In contrast, a VCG analysis  
413 of specimens sampled across a large geographical area at multiple time points can test adaptive  
414 hypotheses because genetic drift and founder effects should produce phenological clines with  
415 random slopes throughout the introduced range, whereas climate adaptation yields parallel  
416 clines.

417 We found that clines in phenology are indeed replicated across North America (Fig. 4),  
418 adding support for the theory that rapid, adaptive evolution of flowering time facilitated the  
419 spread of *L. salicaria* across the continent. An important assumption inherent in the VCG is that  
420 phenology can be predicted by the additive effects of genotype and environment. The parallel  
421 clines shown in Figure 3 support this assumption because the slopes would differ if genotypes  
422 had a strong statistical interaction with environmental characteristics that covary with latitude  
423 (e.g. photoperiod, temperature). Instead, we observe a constancy of clines across rearing  
424 environments, both real and virtual.

425 We hypothesized that adaptive clines could evolve along two distinct trajectories  
426 analogous to long-term evolutionary dynamics observed in the fossil record (Fig. 1). Our  
427 analysis supports the PEM over the CEM, with a constant rate of cline evolution for ~100 years  
428 followed by a contemporary period of relative stasis (Fig. 5). Indeed, the NLS model suggests  
429 two different but complementary mechanisms of cline evolution. Perhaps the more intuitive is  
430 the strengthening of the season length coefficient from near-zero (Fig. 5c). In other words,  
431 season length is a significant predictor of phenology in the model for populations established  
432 >50 years ago but this effect weakens for younger populations. This is consistent with the  
433 continent-wide evolution of flowering phenology in response to variation in season length, as  
434 predicted by a selection-constraint model developed for populations in eastern North America  
435 (Colautti *et al.* 2010; Colautti & Barrett 2013). In addition to the NLS results, the selection-  
436 constraint model and the PEM are further supported by the region-specific temporal analysis of  
437 clines (Fig.4). East Coast populations were well established by the time of first collection and  
438 show a relatively stable cline varying with season length. Contemporary populations in the  
439 Midwest have a similar cline that weakens back toward the time of establishment (~1900). In  
440 contrast, West Coast populations did not establish until the 1920s, and the correlation coefficient  
441 in contemporary populations has not yet reached the same magnitude as the two older regions  
442 (Fig. 4).

443 Complementary to evolution of phenology as an adaptive response to season length, the  
444 NLS model reveals a second potential mechanism of adaptive evolution via a strengthening of  
445 the temperature accumulation coefficient with time since establishment (Fig. 5b). This effect is  
446 not dependent on season length but rather shows a general strengthening through time of the  
447 relationship between the phenological index ( $\varphi$ ) and growing degree days ( $GDD_C$ ). This  
448 response is consistent with the evolution of environmental cues, growth rates, development

449 times, and other mechanisms that allow genotypes to fine-tune phenologies to maximize survival  
450 and reproduction in local climates.

451 Together, our analysis supports convergent evolution of local adaptation throughout  
452 North America over a timescale of ~100 years, followed by a contemporary period of relative  
453 stasis. The hundred-year response to selection may not be unique to *L. salicaria*, as many other  
454 Eurasian plants introduced to North America also exhibit genetically-based clines (Colautti *et al.*  
455 2009) and segregate genetic variation for quantitative traits at levels comparable to native  
456 genotypes (Colautti & Lau 2015). Once parameterized with reciprocal transplant experiments,  
457 the VCG could be applied to reconstruct cline evolution in other invasive species and more  
458 generally in species experiencing novel and changing environments.

459 We have focused our analysis on flowering time of *Lythrum salicaria* in North America  
460 because we had observations from common garden experiments necessary to model effects of  
461 growing environment and to validate predicted phenological development times ( $\psi$ ). However,  
462 the VCG analysis should be feasible for any trait that can be observed in (or inferred from)  
463 preserved specimens or other historical records provided (i) historical data are available to  
464 reconstruct environmental conditions at the time of collection, and (ii) a developmental model  
465 can be parameterized to account for different growing environments. In our case, population-by-  
466 environment interactions were not strong for the trait of interest, allowing our model to  
467 accurately recreate clines without knowledge of local genotype (Fig. 3). However, traits with  
468 stronger genotype- or population-by-environment interactions could be analyzed following the  
469 VCG if a more detailed model were available to correct for major demes or genotypes, which  
470 might be inferred using molecular genetic markers.

471 Convergent cline formation and stasis demonstrate how evolution of ecologically  
472 important traits in natural systems can be predictable on scales most relevant to modern human  
473 civilization: continental to global spatial scales over decades to centuries. The VCG analysis we  
474 introduce is just one example of how natural history collections can be mobilized to complement  
475 limitations of scale and simplism necessary for tractable experimentation. Preserved specimens  
476 offer a rare window back through time but are vulnerable to loss without financial and academic  
477 support. Global efforts to manage biodiversity in the Anthropocene could benefit from a more  
478 predictive science of adaptive evolution in natural systems, but this will be difficult without  
479 continued support for natural history collections at a global scale.

480 **Data & Code availability:** A reproducible analysis, including all image sources and  
481 measurement data are available from the Dryad archive (DOI: [Reviewer Note: zip files for Dryad](#)  
482 [are uploaded with manuscript and also available in public Repo on GitHub](#)  
483 <https://github.com/ColauttiLab/WuColauttiHerbarium>).

484 **Acknowledgments:** We thank SCH Barrett, LH Rieseberg, CA Rushworth, KG Turner for  
485 manuscript feedback, and the following people for generously digitizing herbarium records for  
486 our study: M Pace & B Theirs (NY Botanical Garden), D Brandon (U Memphis), CA  
487 McCormick (UNC Chapel Hill), J Shepard & T Barry (UC Davis), L Struwe (Chrysler  
488 Herbarium), R Kleinman (Zimmerman Herbarium SNM), M Nazaire (Rancho Santa Ana  
489 Botanic Garden), A Sanders (UC Riverside), P Wolf (Utah State U), D Stover (Kent State U), D



490 Fabijan (U Alberta), S Perkins (San Juan College), K Damboise (Herbier Louis-Marie), N  
491 Cowden (Ramsey-Freer Herbarium), S Fuentes-Soriano (New Mexico State U), W Erica (Royal  
492 Museum of British Columbia), D Giblin (U Washington), M Hooker (Marion Ownbey  
493 Herbarium), and A Liston (Oregon State U). This research was supported by NSERC Discovery  
494 grant to RIC.

495 **Author contributions:** Both authors contributed to conceptualization, analysis and writing. In  
496 addition, YW wrote the final code and RIC was responsible for funding, supervision and project  
497 administration

#### 498 **References:**

- 499 Bell, G. & Gonzalez, A. (2009). Evolutionary rescue can prevent extinction following  
500 environmental change. *Ecology Letters*, 12, 942–948.
- 501 Blows, M.W. & Hoffmann, A.A. (2005). A Reassessment of Genetic Limits to Evolutionary  
502 Change. *Ecology*, 86, 1371–1384.
- 503 Chun, Y.J. (2011). Phenotypic plasticity of introduced versus native purple loosestrife: univariate  
504 and multivariate reaction norm approaches. *Biol Invasions*, 13, 819–829.
- 505 Colautti, R.I., Alexander, J.M., Dlugosch, K.M., Keller, S.R. & Sultan, S.E. (2017). Invasions  
506 and extinctions through the looking glass of evolutionary ecology. *Philosophical  
507 Transactions of the Royal Society B: Biological Sciences*, 372, 20160031.
- 508 Colautti, R.I. & Barrett, S.C.H. (2010). Natural Selection and Genetic Constraints on Flowering  
509 Phenology in an Invasive Plant. *Int. J. Plant Sci.*, 171, 960–971.
- 510 Colautti, R.I. & Barrett, S.C.H. (2011). Population divergence along lines of genetic variance  
511 and covariance in the invasive plant *Lythrum salicaria* in eastern North America.  
512 *Evolution*, 65, 2514–2529.
- 513 Colautti, R.I. & Barrett, S.C.H. (2013). Rapid adaptation to climate facilitates range expansion of  
514 an invasive plant. *Science*, 342, 364–366.
- 515 Colautti, R.I., Eckert, C.G. & Barrett, S.C.H. (2010). Evolutionary constraints on adaptive  
516 evolution during range expansion in an invasive plant. *Proceedings of the Royal Society  
517 B: Biological Sciences*, 277, 1799–1806.
- 518 Colautti, R.I. & Lau, J.A. (2015). Contemporary evolution during invasion: evidence for  
519 differentiation, natural selection, and local adaptation. *Molecular Ecology*, 24, 1999–  
520 2017.
- 521 Colautti, R.I., Maron, J.L. & Barrett, S.C.H. (2009). Common garden comparisons of native and  
522 introduced plant populations: latitudinal clines can obscure evolutionary inferences.  
523 *Evolutionary Applications*, 2, 187–199.
- 524 Davis, C.C., Willis, C.G., Connolly, B., Kelly, C. & Ellison, A.M. (2015). Herbarium records are  
525 reliable sources of phenological change driven by climate and provide novel insights into  
526 species' phenological cueing mechanisms. *American Journal of Botany*, 102, 1599–1609.

- 527 Desmet, P. & Brouillet, L. (2013). Database of Vascular Plants of Canada (VASCAN): a  
528 community contributed taxonomic checklist of all vascular plants of Canada, Saint Pierre  
529 and Miquelon, and Greenland. *PhytoKeys*, 55–67.
- 530 Etterson, J.R., Franks, S.J., Mazer, S.J., Shaw, R.G., Gorden, N.L.S., Schneider, H.E., *et al.*  
531 (2016). Project Baseline: An unprecedented resource to study plant evolution across  
532 space and time. *American Journal of Botany*, 103, 164–173.
- 533 Ferrarese, E., Garono, R.J. & Schooler, S. (2009). *Assessment of Purple Loosestrife Biocontrol*  
534 *Agent Populations on the Columbia River*. Earth Design Consultants, Inc.
- 535 Franks, S.J., Hamann, E. & Weis, A.E. (2017). Using the resurrection approach to understand  
536 contemporary evolution in changing environments. *Evol Appl*, 11, 17–28.
- 537 Franks, S.J., Sim, S. & Weis, A.E. (2007). Rapid evolution of flowering time by an annual plant  
538 in response to a climate fluctuation. *PNAS*, 104, 1278–1282.
- 539 GBIF.org. (2017). GBIF: The Global Biodiversity Information Facility.
- 540 Gould, S.J. & Eldredge, N. (1993). Punctuated equilibrium comes of age. *Nature*, 366, 223–227.
- 541 Gräler, B., Pebesma, E. & Heuvelink, G. (2016). Spatio-Temporal Interpolation using gstat. *The*  
542 *R Journal*, 8, 204–218.
- 543 Grant, P.G. & Grant, R.G. (2014). *40 Years of Evolution: Darwin's Finches on Daphne Major*  
544 *Island*. Princeton University Press, Princeton, NJ.
- 545 Hendry, A.P. (2020). *Eco-evolutionary Dynamics*. Princeton University Press.
- 546 Hendry, A.P. & Kinnison, M.T. (1999). Perspective: The pace of modern life: measuring rates of  
547 contemporary microevolution. *Evolution*, 53, 1637–1653.
- 548 Hereford, J. (2009). A Quantitative Survey of Local Adaptation and Fitness Trade-Offs. *The*  
549 *American Naturalist*, 173, 579–588.
- 550 Kingsolver, J.G., Diamond, S.E., Siepielski, A.M. & Carlson, S.M. (2012). Synthetic analyses of  
551 phenotypic selection in natural populations: lessons, limitations and future directions.  
552 *Evol Ecol*, 26, 1101–1118.
- 553 Knapp, A.K., Smith, M.D., Hobbie, S.E., Collins, S.L., Fahey, T.J., Hansen, G.J.A., *et al.* (2012).  
554 Past, Present, and Future Roles of Long-Term Experiments in the LTER Network.  
555 *BioScience*, 62, 377–389.
- 556 Lang, P.L.M., Willems, F.M., Scheepens, J.F., Burbano, H.A. & Bossdorf, O. (2019). Using  
557 herbaria to study global environmental change, 221, 110–122.
- 558 Langlet, O. (1971). Two Hundred Years Genecology. *Taxon*, 20, 653–721.
- 559 Lindgren, C.J. & Walker, D. (2012). Growth Rate, Seed Production, and Assessing the Spatial  
560 Risk of *Lythrum salicaria* using Growing Degree-Days. *Wetlands*, 32, 885–893.
- 561 Lohmueller, K.E. (2014). The impact of population demography and selection on the genetic  
562 architecture of complex traits. *PLoS Genet*, 10.

- 563 Menne, M.J., Durre, I., Vose, R.S., Gleason, B.E. & Houston, T.G. (2012). An Overview of the  
564 Global Historical Climatology Network-Daily Database. *Journal of Atmospheric &*  
565 *Oceanic Technology*, 29, 897–910.
- 566 Merilä, J. & Hendry, A.P. (2014). Climate change, adaptation, and phenotypic plasticity: the  
567 problem and the evidence. *Evolutionary Applications*, 7, 1–14.
- 568 Montague, J.L., Barrett, S.C.H. & Eckert, C.G. (2008). Re-establishment of clinal variation in  
569 flowering time among introduced populations of purple loosestrife (*Lythrum salicaria*,  
570 *Lythraceae*). *J. Evol. Biol.*, 21, 234–245.
- 571 Novembre, J. & Barton, N.H. (2018). Tread lightly interpreting polygenic tests of selection.  
572 *Genetics*, 208, 1351–1355.
- 573 Oduor, A.M.O., Leimu, R. & Kleunen, M. van. (2016). Invasive plant species are locally adapted  
574 just as frequently and at least as strongly as native plant species. *Journal of Ecology*, 104,  
575 957–968.
- 576 Olden, J.D., LeRoy Poff, N., Douglas, M.R., Douglas, M.E. & Fausch, K.D. (2004). Ecological  
577 and evolutionary consequences of biotic homogenization. *Trends in Ecology &*  
578 *Evolution*, 19, 18–24.
- 579 Peischl, S., Dupanloup, I., Kirkpatrick, M. & Excoffier, L. (2013). On the accumulation of  
580 deleterious mutations during range expansions. *Molecular Ecology*, 22, 5972–5982.
- 581 Perkins, T.A., Phillips, B.L., Baskett, M.L. & Hastings, A. (2013). Evolution of dispersal and life  
582 history interact to drive accelerating spread of an invasive species. *Ecol. Lett.*, 16, 1079–  
583 1087.
- 584 Savolainen, O., Pyhäjärvi, T. & Knürr, T. (2007). Gene Flow and Local Adaptation in Trees.  
585 *Annual Review of Ecology, Evolution, and Systematics*, 38, 595–619.
- 586 Schneider, C.A., Rasband, W.S. & Eliceiri, K.W. (2012). NIH Image to ImageJ: 25 years of  
587 image analysis. *Nature Methods*, 9, 671–675.
- 588 Shamsi, S.R.A. & Whitehead, F.H. (1974). Comparative eco-physiology of *Epilobium hirsutum*  
589 L. and *Lythrum salicaria* L.: II. Growth and development in relation to light. *Journal of*  
590 *Ecology*, 62, 631–645.
- 591 Szűcs, M., Vahsen, M.L., Melbourne, B.A., Hoover, C., Weiss-Lehman, C. & Hufbauer, R.A.  
592 (2017). Rapid adaptive evolution in novel environments acts as an architect of population  
593 range expansion. *PNAS*, 114, 13501–13506.
- 594 Tjørve, K.M.C. & Tjørve, E. (2017). A proposed family of Unified models for sigmoidal growth.  
595 *Ecological Modelling*, 359, 117–127.
- 596 US Geological Survey. (2019). *Species occurrence data for the Nation—USGS Biodiversity*  
597 *Information Serving Our Nation (BISON)* (USGS Numbered Series No. 160). *Species*  
598 *occurrence data for the Nation—USGS Biodiversity Information Serving Our Nation*  
599 *(BISON)*, General Information Product. U.S. Geological Survey, Reston, VA.

- 600 Weider, L.J., Jeyasingh, P.D. & Frisch, D. (2018). Evolutionary aspects of resurrection ecology:  
601 Progress, scope, and applications—An overview. *Evolutionary Applications*, 11, 3–10.
- 602 Williams, J.L., Kendall, B.E. & Levine, J.M. (2016). Rapid evolution accelerates plant  
603 population spread in fragmented experimental landscapes. *Science*, 353, 482–485.
- 604 Willis, C.G., Ellwood, E.R., Primack, R.B., Davis, C.C., Pearson, K.D., Gallinat, A.S., *et al.*  
605 (2017). Old Plants, new tricks: Phenological research using herbarium specimens. *Trends*  
606 *in Ecology & Evolution*, 32, 531–546.
- 607
- 608
- 609
